# Supplementary material
Source: Springer Nature journal article supplement (https://www.springermedizin.de/resource/supplementary/12881_2011_987_MOESM7_ESM.pdf/9451640)

**A**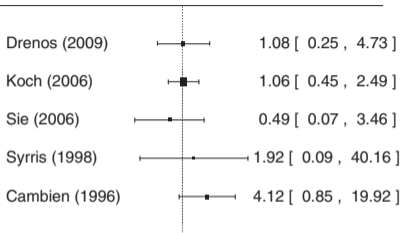

0.02 0.18 1.67 15.53 144.03

Odds Ratio

**B**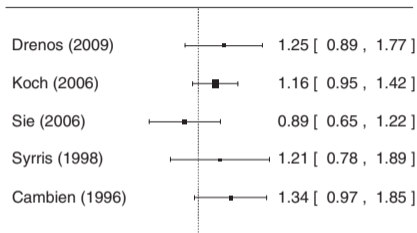

0.53 0.77 1.11 1.61 2.34

Odds Ratio

**C**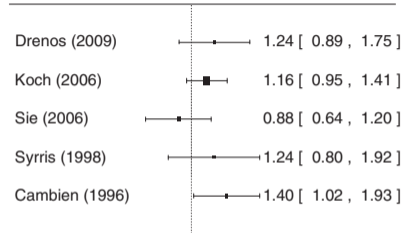

0.52 0.76 1.12 1.64 2.41

Odds Ratio

Supplement: MOESM7 [file 9451640]
